# Supplementary material for: SF-36v2 and FACIT-Fatigue quality of life improvements with organ-specific SELENA-SLEDAI response and belimumab treatment in patients with systemic lupus erythematosus
Source: PubMed Central journal article supplement — Lupus Sci Med. 2024 May 8;11(1):e001118. doi: 10.1136/lupus-2023-001118 (PMC11086192; doi:10.1136/lupus-2023-001118), 2024-05-08
Supplement: lupus-2023-001118supp001.pdf [file lupus-2023-001118supp001.pdf]

## Supplementary material

# **SF-36v2 and FACIT-Fatigue quality of life improvements with organ-specific SELENA-SLEDAI response and belimumab treatment in patients with systemic lupus erythematosus**

Regina Rendas-Baum, Wen-Hung Chen, Kerry Gairy, Seth Anderson, Christine Henning, Anne Hammer, Mark Kosinski

Corresponding author: Wen-Hung Chen  
GSK, Value Evidence and Outcomes, Collegeville, PA, USA

**Supplemental Table 1. Baseline SF-36v2 domain and summary component score decrements from age- and gender-adjusted US general population norm among patients with organ involvement at baseline†**

|                      | Cardiovascular and Respiratory | Central Nervous System | Haematologic  | Immunologic   | Mucocutaneous | Musculoskeletal | Renal         | Vascular      |
|----------------------|--------------------------------|------------------------|---------------|---------------|---------------|-----------------|---------------|---------------|
| SF-36v2              | n=72                           | n=34                   | n=120         | n=1041        | n=1066        | n=846           | n=186         | n=83          |
| Physical Functioning | -16.17<br>***                  | -13.95<br>***          | -11.08<br>*** | -10.54<br>*** | -11.04<br>*** | -13.13<br>***   | -10.93<br>*** | -9.83<br>***  |
| Role Physical        | -16.65<br>***                  | -17.02<br>***          | -12.58<br>*** | -12.37<br>*** | -12.99<br>*** | -14.32<br>***   | -12.32<br>*** | -13.70<br>*** |
| Bodily Pain          | -14.20<br>***                  | -11.63<br>***          | -10.33<br>*** | -8.95<br>***  | -9.96<br>***  | -11.95<br>***   | -7.92<br>***  | -8.44<br>***  |
| General Health       | -17.30<br>***                  | -16.78<br>***          | -15.04<br>*** | -14.37<br>*** | -14.46<br>*** | -15.25<br>***   | -15.01<br>*** | -14.78<br>*** |
| Vitality             | -9.85<br>***                   | -11.54<br>***          | -6.62<br>***  | -4.98<br>***  | -6.11<br>***  | -7.56<br>***    | -4.75<br>***  | -5.00<br>***  |
| Social Functioning   | -14.66<br>***                  | -15.54<br>***          | -11.01<br>*** | -9.95<br>***  | -10.59<br>*** | -11.69<br>***   | -9.36<br>***  | -10.21<br>*** |
| Role Emotional       | -12.42<br>***                  | -14.44<br>***          | -10.88<br>*** | -11.50<br>*** | -11.92<br>*** | -12.86<br>***   | -10.87<br>*** | -12.39<br>*** |
| Mental Health        | -8.61<br>***                   | -13.09<br>***          | -7.85<br>***  | -7.56<br>***  | -8.01<br>***  | -8.46<br>***    | -7.35<br>***  | -7.99<br>***  |
| PCS                  | -17.43<br>***                  | -14.34<br>***          | -12.45<br>*** | -11.45<br>*** | -12.07<br>*** | -14.01<br>***   | -11.60<br>*** | -11.29<br>*** |
| MCS                  | -8.40<br>***                   | -12.82<br>***          | -7.71<br>***  | -7.46<br>***  | -8.01<br>***  | -8.42<br>***    | -6.87<br>***  | -8.17<br>***  |

†Only patients with non-missing data for change from baseline to Week 52 in all SF-36v2 domains were included in comparison to the US general population norm. \* $p \leq 0.05$ ; \*\* $p \leq 0.01$ ; \*\*\* $p \leq 0.001$ .

MCS, Mental component summary; PCS, Physical component summary; SF-36v2, 36-Item Short Form Health Survey version
